# Supplementary material for: Chiral MoS2 Quantum Dots: Dual‐Mode Detection Approaches for Avian Influenza Viruses
Source: PubMed Central journal article supplement (PMC6607333; doi:10.1002/gch2.201700071), 2018-03-12
Supplement: GCH2-2-1700071-s001.pdf [file GCH2-2-1700071-s001.pdf]

# Global Challenges

---

Open Access

## Supporting Information

for *Global Challenges*, DOI: 10.1002/gch2.201700071

**Chiral MoS<sub>2</sub> Quantum Dots: Dual-Mode Detection  
Approaches for Avian Influenza Viruses**

*Syed Rahin Ahmed and Suresh Neethirajan\**

# Supporting Information

## **Chiral MoS<sub>2</sub> Quantum Dots: Dual-Mode Detection Approaches for Avian Influenza Viruses using Magnetochirofluorescent Nanohybrids**

Syed Rahin Ahmed<sup>1</sup> and Suresh Neethirajan<sup>1\*</sup>

<sup>1</sup>BioNano Laboratory, School of Engineering, University of Guelph, Guelph, Ontario, Canada  
N1G 2W1

\*Corresponding author: [sneethir@uoguelph.ca](mailto:sneethir@uoguelph.ca) (SN)

### Confirmation of antibodies specificity towards target virus

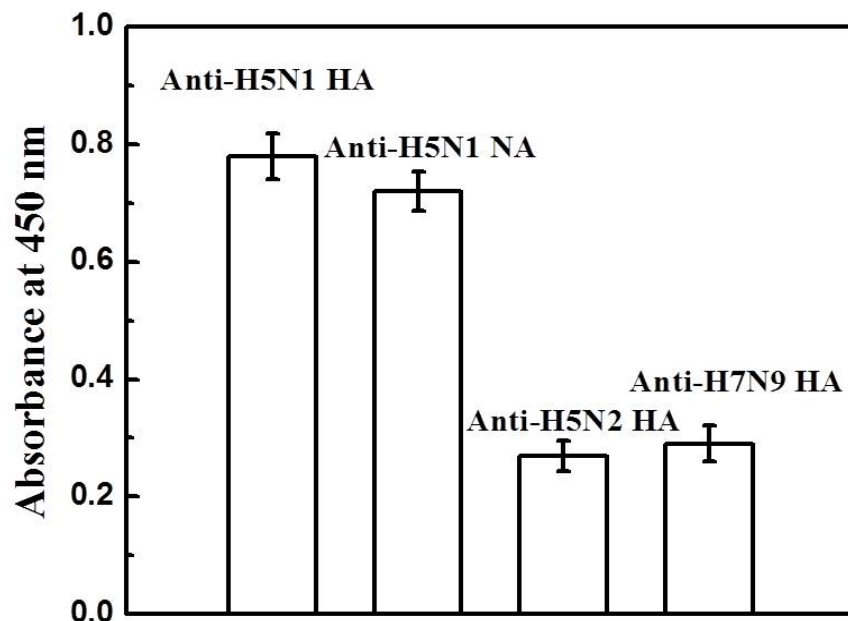

Figure S1: ELISA results of antibodies specificity towards target viruses.

### Binding confirmation of anti-H5N1 HA Ab 135382 with QDs and anti-H5N1 NA Ab with MNPs

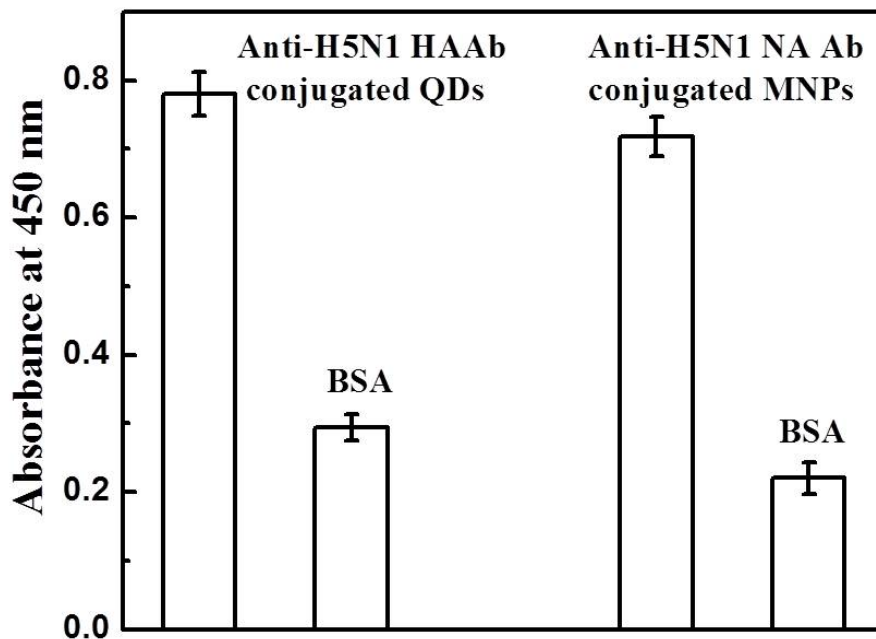

Figure S2: ELISA results of antibodies binding with MoS<sub>2</sub> QDs and MNPs.

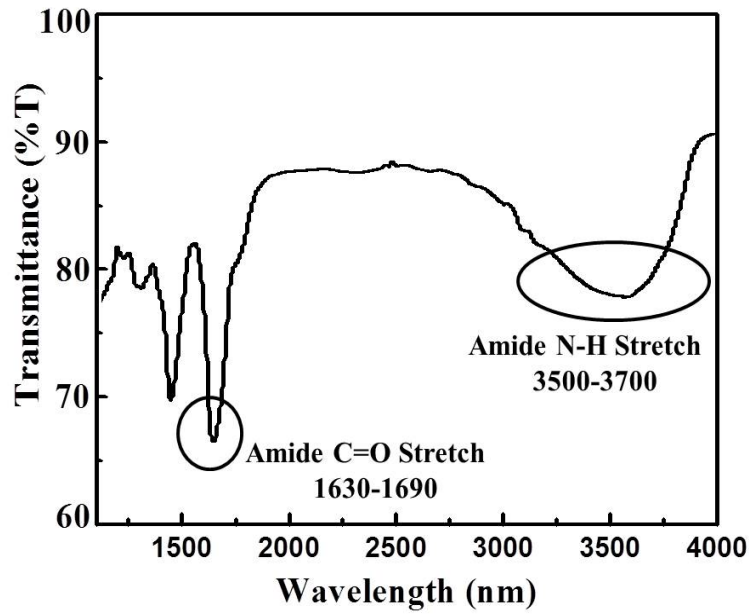

**Figure S3:** FTIR spectra of antibodies conjugated MNPs.

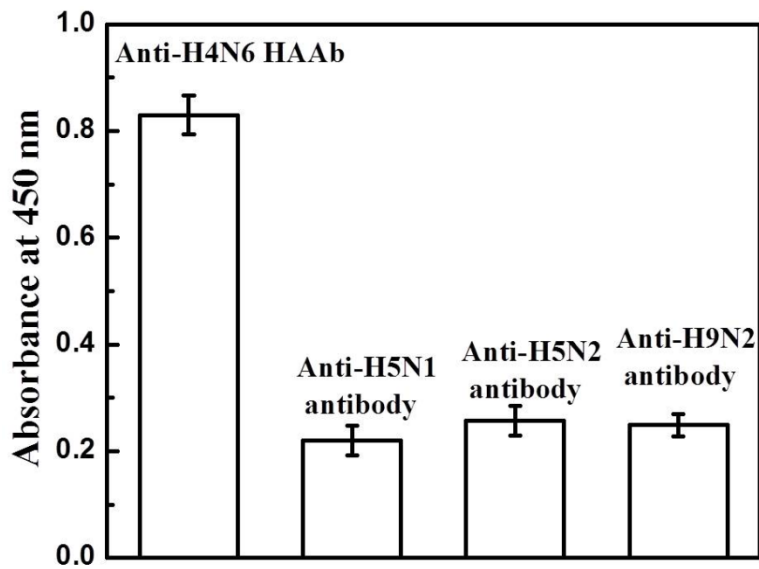

**Figure S4:** ELISA results of antibodies specificity towards avian influenza A (H4N6) virus.

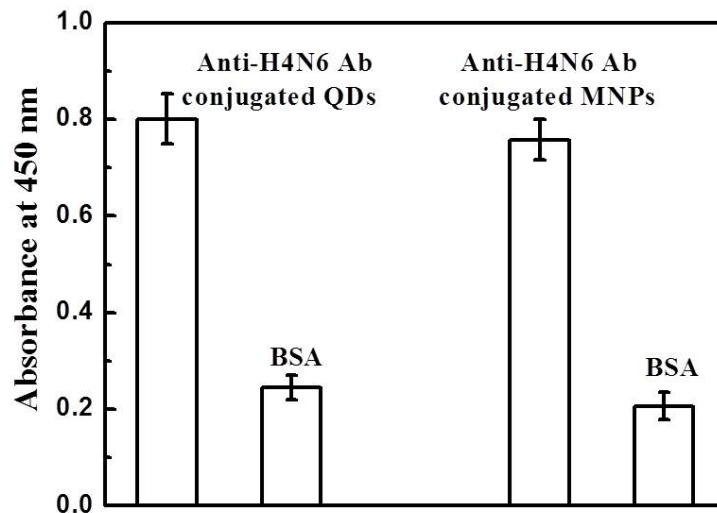

**Figure S5:** Binding confirmation of antibodies with MoS<sub>2</sub> QDs and MNPs through ELISA method.

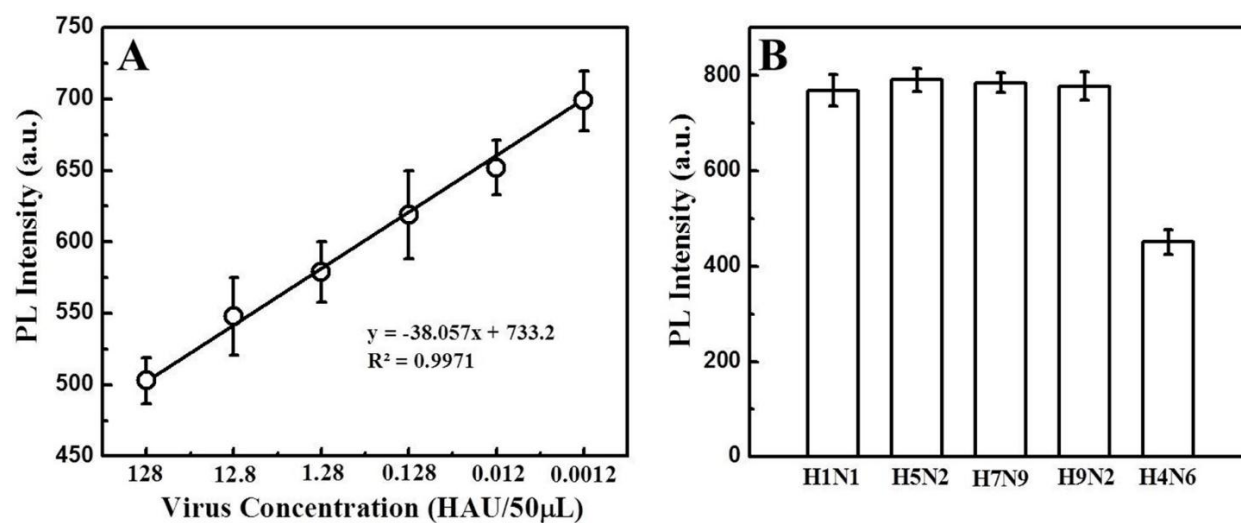

**Figure S6:** Fluorescence detection of virus culture sample: (A) calibration curve of avian influenza virus A (H4N6) concentration VS fluorescence responses; and (B) selectivity results of detection in chicken blood media.

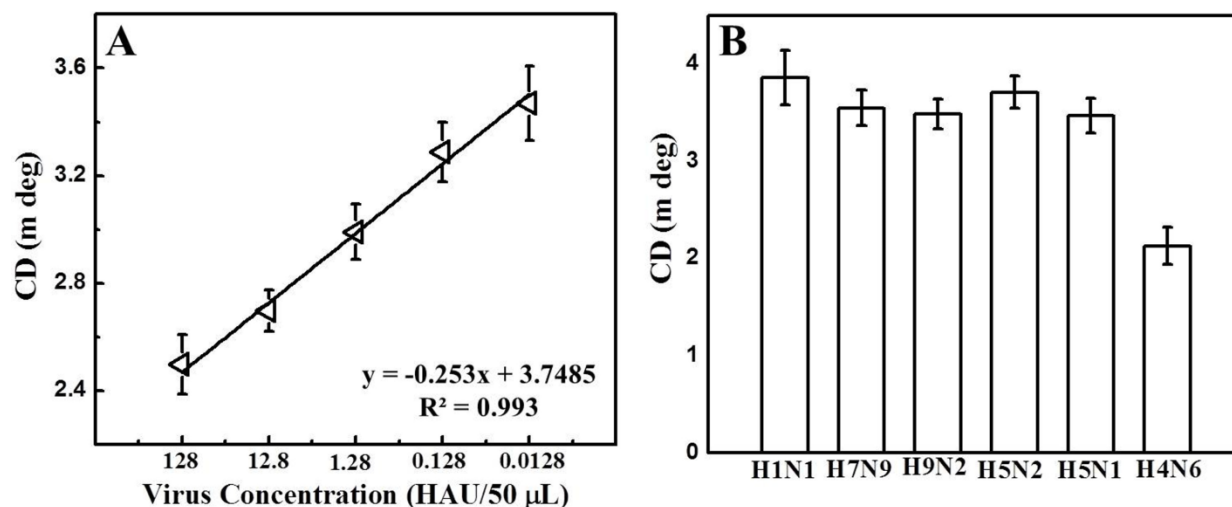

**Figure S7:** Chiral-based optical detection of virus culture sample: (A) calibration curve of avian influenza virus A (H4N6) concentration VS chiral responses; and (B) selectivity results of chiral-based detection in chicken blood media.

**Table S1:** Step by step analysis of zeta potential value

|                      | Zeta potential (mV)  |                                            |                                   |
|----------------------|----------------------|--------------------------------------------|-----------------------------------|
|                      | MoS <sub>2</sub> QDs | after conjugation with Poly-l lysine (PLL) | after conjugation with antibodies |
| MoS <sub>2</sub> QDs | -20.52               | +10.31                                     | -3.83                             |

**Table S2:** Comparison of avian influenza virus A (Avian/Vietnam/1203/04) (H5N1) detection using different methods

| Detection method   | Virus concentration (pg/mL) |        |        |        |        |        |    |   |   |
|--------------------|-----------------------------|--------|--------|--------|--------|--------|----|---|---|
|                    | $10^7$                      | $10^6$ | $10^5$ | $10^4$ | $10^3$ | $10^2$ | 10 | 1 | 0 |
| Proposed PL sensor | +                           | +      | +      | +      | +      | +      | +  | - | - |
| Proposed CD sensor | +                           | +      | +      | +      | +      | +      | -  | - | - |
| Conventional ELISA | +                           | +      | +      | +      | +      | -      | -  | - | - |
| Commercial kit     | +                           | +      | +      | +      | +      | -      | -  | - | - |

**Table S3:** Comparison study of avian influenza A (H4H6) virus detection

| Detection method   | Virus concentration (HAU/ 50 $\mu$ L) |      |      |       |        |         |          |
|--------------------|---------------------------------------|------|------|-------|--------|---------|----------|
|                    | 128                                   | 12.8 | 1.28 | 0.128 | 0.0128 | 0.00128 | 0.000128 |
| Proposed PL sensor | +                                     | +    | +    | +     | +      | +       | -        |
| Proposed CD sensor | +                                     | +    | +    | +     | +      | -       | -        |
| Commercial kit     | +                                     | +    | +    | +     | -      | -       | -        |
